# Supplementary material
Source: publisher figshare collection journal article supplement (https://acs.figshare.com/ndownloader/files/4562776)
Supplement: Supplementary file 1 [file 4562776]

## Supporting Information for

### “Diruthenium Complexes of Axial Ferrocenylpolyynyl Ligands: the Cases of C<sub>6</sub>Fc and C<sub>8</sub>Fc”

Bin Xi, Guo-Lin Xu, Phillip E. Fanwick and Tong Ren

#### Experimental

*n*-BuLi and Et<sub>3</sub>N were purchased from Aldrich, and silica gel was from Merck. CuI was from ACROS. 1-Ferrocenyl-1,3-butadiyne (FcC<sub>4</sub>H)<sup>1</sup> and 1-bromo-2-triethylsilyl (BrC≡CSiEt<sub>3</sub>)<sup>2</sup> were prepared according to the literatures. Unless specified, all syntheses were performed using standard Schlenk techniques under a nitrogen atmosphere.

**Preparation of FcC<sub>6</sub>SiEt<sub>3</sub>.** A Schlenk flask was charged with FcC<sub>4</sub>H (0.414 g, 1.76 mmol), CuI (0.402 g, 2.12 mmol), and THF (50 mL) and cooled to -45°C. Then *n*-BuLi (2.5 M in hexane; 0.85 mL, 2.13 mmol) was added with stirring. The cold bath was removed. After 45 min, EtNH<sub>2</sub> (ca. 1.5 mL) was added, followed by dropwise addition of solution of BrC≡CSiEt<sub>3</sub> (0.460 g, 2.1 mmol) in THF (4 mL). Stirred for another 30 min, the reaction mixture was filtered through a 2 cm silica gel pad, and solvent was removed by rotary vapor. The residue was further purified by column chromatography eluted with hexanes to yield orange oil (0.380 g, 58%). Data for **1**: R<sub>f</sub> 0.74 (THF/Hexanes=1/6). <sup>1</sup>H NMR (CDCl<sub>3</sub>): 4.51 (s, 2H, Fc), 4.23 (s, 7H, Fc), 1.00 (t, 9H, Si(CH<sub>2</sub>CH<sub>3</sub>)<sub>3</sub>), 0.69-0.61 (q, 6H, Si(CH<sub>2</sub>CH<sub>3</sub>)<sub>3</sub>).

**Preparation of FcC<sub>8</sub>SiEt<sub>3</sub>.** To a 60 mL THF/CH<sub>3</sub>OH (2:1, v/v) solution of FcC<sub>6</sub>SiEt<sub>3</sub>

(0.450 g, 1.21 mmol) was added  $\text{K}_2\text{CO}_3$  (0.5 g), and the mixture was stirred for 20 min. The reaction mixture was filtered through a 2 cm silica gel pad, and solvent was removed by rotary vapor. The residue was immediately mixed with CuI (0.100 g, 0.53 mmol) in dry THF (40 mL), and cooled to  $-45^\circ\text{C}$ . Then *n*-BuLi (2.5 M in hexane; 0.3 mL, 0.75 mmol) was added with stirring. The cold bath was removed. After 45 min, the mixture was cooled to  $-20^\circ\text{C}$ , and  $\text{EtNH}_2$  (ca. 0.5 mL) was added. A solution of  $\text{BrC}\equiv\text{CSiEt}_3$  (0.430 g, 1.96 mmol) in THF (4 mL) was added dropwise. The cold bath was removed. After 30 min, the reaction mixture was filtered through a 2 cm silica gel pad, and solvent was removed by rotary vapor. The residue was further purified by column chromatography eluted with hexanes to yield orange solids (0.160 g, 33%). Data for  $\text{FcC}_8\text{SiEt}_3$ :  $R_f$  0.68 (THF/Hexanes=1/6).  $^1\text{H}$  NMR ( $\text{CDCl}_3$ ): 4.55 (*t*, 2H,  $\eta\text{-C}_5\text{H}_4$ ), 4.30 (*t*, 2H, Fc), 4.26 (*s*, 5H, Fc), 1.00 (*t*, 9H,  $\text{Si}(\text{CH}_2\text{CH}_3)_3$ ), 0.68-0.63 (*q*, 6H,  $\text{Si}(\text{CH}_2\text{CH}_3)_3$ ).

(1) Yuan, Z.; Stringer, G.; Jobe, I. R.; Kreller, D.; Scott, K.; Koch, L.; Taylor, N. J.;

Marder, T. B. *J. Organomet. Chem.* **1993**, 452, 115-120.

(2) Zheng, Q. L.; Bohling, J. C.; Peters, T. B.; Frisch, A. C.; Hampel, F.; Gladysz, J. A.

*Chem. Eur. J.* **2006**, 12, 6486-6505.

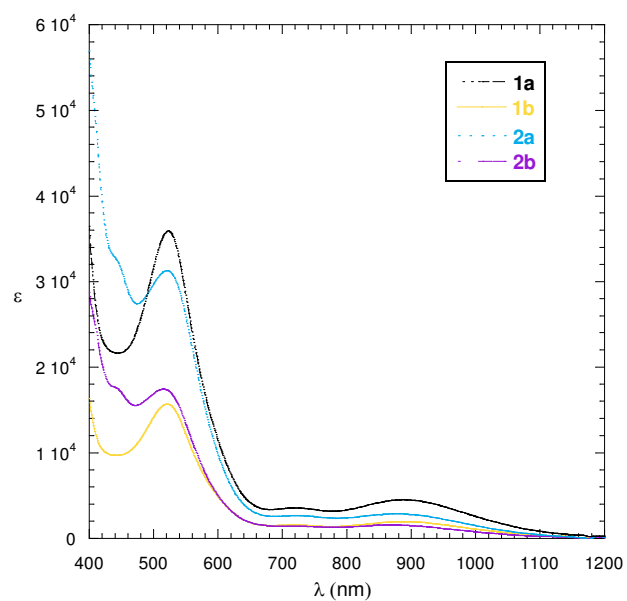

**Figure S1.** Vis-NIR absorption spectra of compounds **1a-2b** recorded in THF.

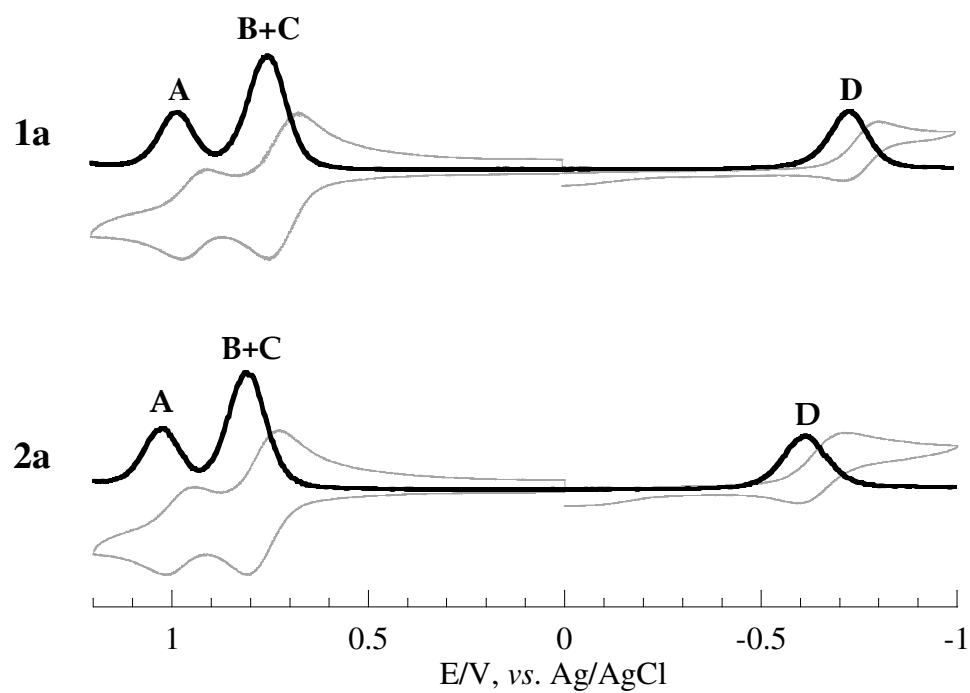

**Figure S2.** DPVs (bold) and CVs (gray) of  $\text{Ru}_2(\text{DMBA})_4(\text{C}_{2n}\text{Fc})_2$  ( $n = 3$  and  $4$ ) recorded in 0.20 M THF solution of  $\text{Bu}_4\text{NPF}_6$ .
